# Supplementary material
Source: Springer Nature journal article supplement (https://www.springermedizin.de/resource/supplementary/12882_2013_755_MOESM2_ESM.pdf/9454648)
Supplement: MOESM2 [file 9454648]

|                                         | Normal to low albuminuria (<30mg/g) (%) | Moderate albuminuria (30-300mg/g) (%) | Severe albuminuria (>300mg/g) (%) |
|-----------------------------------------|-----------------------------------------|---------------------------------------|-----------------------------------|
| eGFR $\geq$ 60ml/min/1.73m <sup>2</sup> | 5                                       | 55                                    | 84                                |
| eGFR 45-59ml/min/1.73m <sup>2</sup>     | 82                                      | 96                                    | 99                                |
| eGFR 30-44ml/min/1.73m <sup>2</sup>     | 99                                      | 99                                    | 99                                |
